# Supplementary material
Source: PubMed Central journal article supplement (PMC4024926)
Supplement: 1319221111_pnas.201319221SI.pdf [file 1319221111_pnas.201319221SI.pdf]

# Supporting Information

Miller-Fleming et al. 10.1073/pnas.1319221111

## SI Materials and Methods

**Strains and Genotyping.** The *hsp31Δ* strain was a kind gift from Marek Skoneczny (Institute of Biochemistry and Biophysics, Polish Academy of Science, Warsaw) and *hsp32Δ* was obtained by sporulation of the BY4743 strain heterozygous for the HSP32 deletion (Thermo Scientific Open Biosystems). The *hsp33Δ* and *hsp34Δ* strains (in the BY4742 background) were generated by PCR-based gene disruption as previously described (1). Because the flanking regions of these genes are identical, the same pair of primers was used to amplify the MX cassettes and delete the genes. The primers used are listed in Table S6. The strategy for gene-deletion verification consisted in performing the following PCR reactions: (i) amplification of HSP32 and HSP33: forward primer complementary to HSP32, HSP33, and HSP34 (HSP32/33/34F) together with a reverse primer that hybridizes with HSP32 and HSP33 3' flanking regions (HSP32/33R); (ii) amplification of HSP34: forward primer HSP32/33/34 and a reverse primer specific to HSP34 3' flanking region (HSP34R); (iii) amplification of the cassette integrated either at the HSP32 or HSP33 locus [forward primer complementary to the cassette (MX4F) and HSP32/33R]; (iv) amplification of the cassette integrated at the HSP34 locus (MX4F + HSP34R). To distinguish between HSP32 and HSP33, the 3' flanking region was amplified and digested with BsgI, which has a unique restriction digestion site in the HSP32 flanking region. To further confirm the knockout strains, the flanking regions of the deleted genes were analyzed by DNA sequencing and real-time quantitative PCR (qRT-PCR). The knockout strains were crossed to generate a heterozygous diploid quadruple knockout. By sporulation and tetrad dissection of the diploid strain, WT and single knockout strains were selected (Lx strains). Experiments were performed on the original strains and repeated with Lx strains with no differences observed among the phenotypes analyzed. Microarrays were performed with RNA retrieved from Lx strains. The remaining knockout strains used: *gis1Δ*, *sod1Δ*, and *yap1Δ* were obtained from EUROSCARF (Table S5). W303 was used for the colocalization studies performed in Fig. 6 C and D.

**Plasmids.** HSP31, HSP32, HSP33, HSP34, and DCP1 ORFs were subcloned using Gateway Cloning technology. ORFs were moved from entry clones (HSP31–34 plasmids kindly provided by Tony Hazbun, Purdue University, West Lafayette, IN) into the expression vector pAG416GPD-*ccdB*-HA (HSP31–34) and pAG415GPD-*ccdB*-DsRed (DCP1) (Addgene). HSP31 and HSP32 were also cloned by the Gateway system into p416GPD-*ccdB*-GFP. The plasmid pRS316 GFP-Atg8 (2) was kindly given by Yoshinori Ohsumi (Tokyo Institute of Technology, Tokyo) and pRS315 HA-Atg13 by Daniel Klionsky (University of Michigan, Dearborn, MI) (3). Both genes are under control of their endogenous promoters. The plasmid BG1805 (encoding the Leu2-His6-HA-protease-3Csite-ZZ domain) was obtained from the ORF library (Thermo Scientific Open Biosystems); the protein of interest is expressed under control of the GAL1 promoter. pTA19 (kindly given by Uesono Yukifumi, University of Tokyo, Tokyo) was used to integrate GFP in the genome to fuse with Kog1 as described previously (4). Plasmids pRP1362 (Pab1-GFP, URA) (5), pRP1575 (Ecd3-mcherry, TRP) (6), and pRP1662 (Pub1-m-cherry, TRP) (6) were kindly given by Roy Parker (University of Colorado, Boulder, CO).

**Media and Growth Conditions.** Yeast strains were grown on standard media: YPD [2% (wt/vol)], synthetic complete media

containing all of the amino acids (SC) or lacking uracil (SC-URA) or leucine (SC-LEU). SC contains yeast nitrogen base (YNB), 2% (wt/vol) glucose, and a mixture of all of the amino acids or a URA or LEU dropout powders. For starvation experiments, cultures were grown until midlog phase in SC, SC-URA, or SC-LEU, washed once with water, and then resuspended either on carbon starvation media (SC-C), which is the respective synthetic complete media without any carbon source, or on nitrogen-starvation media (SC-N) that contains of 0.17% of YNB without amino acids and ammonium sulfate and glucose at 2% (wt/vol). Rapamycin (Sigma) was added to midlog phase cultures growing on SC-URA at a final concentration of 200 ng/mL. For *GAL1* induction analysis, cultures were grown in SC-URA with 2% (wt/vol) glucose until midlog phase, washed, and resuspended in SC-URA with 2% (wt/vol) galactose. Cultures were harvested for protein extraction at the indicated time points. Optical densities at wavelength 600 nm ( $OD_{600}$ ) were measured on a microplate reader (Tecan Infinite M200TM).

**Microarray Analysis.** WT, *hsp31Δ*, *hsp32Δ*, and *hsp33Δ* were harvested when cultures reached diauxic-shift (DS). RNA was obtained as described above for qRT-PCR analyses. Three independent RNA samples of each strain were used. RNA integrity was determined on the Agilent 2100 bioanalyzer. cDNA was synthesized from total RNA and amplified as fluorescent cRNA (cyanine 3-labeled CTP) using Agilent's Low Input Quick Amp Labeling Kit (one-color label) following the manufacturer's instructions. Labeled cRNA was purified and hybridized to Agilent yeast gene expression microarrays (containing 6,256 60-mer probes). Scanning was done on GenePix 4200A and normalization was performed in ArrayTrackTM using mean median scaling without background subtraction. WT expression profiles were compared individually to each knockout strain profile. Statistical significance was obtained using Welch's *t* test in ArrayTrack.

**Immunoprecipitation and Mass Spectrometry.** WT BY4741 cells expressing either GFP, Hsp31-GFP, or Hsp32-GFP were harvested at DS. The pellet was resuspended with immunoprecipitation buffer (50 mM Tris-HCl, pH 7.5, 0.5 mM EDTA, 150 mM NaCl, 0.05% Tergitol solution Type Nonidet P-40). For immunoprecipitation, GFP Trap-A beads (Chromotek) were used, following manufacturer instructions. Samples were run on an SDS-polyacrylamide and were sent for mass spectrometry analysis at the proteomics facility at University Medical Center Göttingen, Germany.

**Zymolyase Assay.** Cells were collected by centrifugation and resuspended on Tris-HCl (10 mM) containing  $\beta$ -mercaptoethanol (40 mM) and 50  $\mu$ g/mL of zymolyase-20T (Seikagaku).  $OD_{600}$  was measured every 10 min.

**Cell Cycle Analysis.** Cells in early stationary phase (SP) were fixed and stained with propidium iodide as previously described (7). Briefly, cells were pelleted and resuspended by vortexing in cold 70% (vol/vol) ethanol. After fixation, cells were washed and resuspended on sodium citrate pH 7, containing RNase A (Sigma) to a final concentration of 0.1 mg/mL. After 2 h incubation at 37 °C, cells were stained with propidium iodide (final concentration 4  $\mu$ g/mL) and analyzed by flow cytometry on a BD LSR Fortessa and detected on the 575/26 nm channel. DNA content was quantified on FlowJo v9.6.2.

**Survival Assays.** Sensitivity to oxidative stress or thermotolerance was evaluated by spotting assays. Fresh colonies were grown in liquid YPD overnight, serially diluted, normalized to an OD<sub>600</sub> of 0.1, and spotted on solid SC media containing hydrogen peroxide at different concentrations (1.6 mM and 2.3 mM). For heat shock, cultures were normalized by the number of cells and incubated at 50 °C at the indicated time points. For chronological lifespan (CLS) determination, cultures were grown on SC media containing 2% glucose, diluted back to synchronize their growth, and allowed to grow until cultures ceased dividing (beginning of SP). This time point was considered as day 0. Survival was measured by counting CFUs or by spotting assays (in the case of Fig. S1F) with 100% survival determined by the number of CFU or spot growth at day 0. CFU or spotting assays were performed by taking an aliquot of each culture at the indicated time points, serial diluting and plating or spotting the dilutions on YPD plates.

**qRT-PCR.** For oxidative stress treatments, liquid cultures of cells in midlog phase were treated with hydrogen peroxide (0.5 mM and 2 mM) for 1 h. Starvation was performed as described above for 1 h. After treatment, cells were harvested, pelleted, and stored at –80 °C until needed. RNA was extracted using Qiagen RNeasy Midi kits following the manufacturer's instructions. Genomic DNA contamination was removed from RNA using Turbo DNase (Ambion) according to the manufacturer's protocol. Next, 500 ng of total RNA was used as a template to synthesize cDNA with the Qiagen QuantiTect Reverse Transcription kit. To ensure that RNA had no genomic DNA contamination, a control reaction was included in which no reverse transcription was carried out. Primers used for qRT-PCR are listed in Table S6. Reactions were carried out using a LightCycler Real-Time PCR System (Roche) with the Thermo Scientific Maxima SYBR Green/ROX qPCR Master Mix (Thermo Fisher Scientific). Primers were analyzed for specificity and efficiency. PCR efficiencies ranged from 0.80 to 1.0. Specificity was assessed by melting curve profile analysis; for *HSP32* and *HSP33* primers, because of their high homology, specificity was ensured by the absence of amplification when cDNA of the respective knockout strain was used as template. The crossing thresholds (CT) were calculated by the second derivative method using the LightCycler Relative Quantification Software. The relative quantification was corrected for PCR efficiency. TAF10 and UBC6 were used as housekeeping genes to normalize the cDNA input between samples. Three independent cDNA samples were analyzed. Statistical significance was determined using Student *t* test.

**Stress Granule/P-Body Analysis.** Cycloheximide was added 2 min before heat shock at 100 µg/mL. Treated and nontreated cells were washed twice and resuspended in fresh SC media lacking the appropriate amino acids. These cells were incubated at 46 °C for 30 min and imaged immediately after heat shock. For glucose

starvation, cells were washed twice and left with SC-C for 1 h. Glucose was readded to starved cells at 2% and imaged after 30 min. The percentage of cells with foci was scored with ImageJ software (<http://rsbweb.nih.gov/ij/index.html>). Brightness and contrast were adjusted with Adobe Photoshop when required.

**Microarray Validation.** Technical validation of the microarrays was performed by relative quantification of the expression of 11 genes by qRT-PCR, using as a template cDNA obtained from the RNA used for the microarrays. The qRT-PCR primers are listed in Table S6. Gene ontology was analyzed using the online DAVID Functional Annotation Tool (8) (<http://david.abcc.ncifcrf.gov>).

**Immunoblotting, Immunoprecipitation, and Kinase Assays.** At the indicated time points, the volume of cells equivalent to OD<sub>600</sub> = 1.5 was collected and precipitated with TCA. Protein extracts were separated by SDS/PAGE, transferred to nitrocellulose membranes (Bio-Rad), followed by immunoblotting with α-GFP (University of California, Davis/National Institutes of Health NeuroMab Facility), α-HA (Santa Cruz Biotechnology), or α-Pgk1 (Invitrogen) antibodies. For HA-Atg13 immunoprecipitation, the volume corresponding to an OD<sub>600</sub> = 7 was harvested and lysed as described in ref. 9. For log-phase samples, 10 optical densities were collected. The resulting protein extract was incubated with α-HA (Roche) followed by incubation with Protein G agarose beads (Invitrogen) with rotatory agitation at 4 °C. Beads were washed, resuspended on 2× loading buffer [200 mM Tris-HCl, 8% (wt/vol) SDS, 40% (vol/vol) glycerol, 0.4% bromophenol blue, 6% β-mercaptoethanol], boiled, and loaded on an SDS-polyacrylamide gel. After protein separation, the protein extracts were transferred to nitrocellulose membranes and blotted for phospho-(Ser/Thr) PKA substrate antibody (Cell Signaling). After incubation with the secondary antibody and exposure to X-ray film, the membrane was washed with a stripping solution (25 mM glycine hydrochloride, SDS 1%, pH 2) and incubated with α-HA (Santa Cruz Biotechnology). For phosphatase treatment, HA-Atg13 was immunoprecipitated and incubated with 200 units of λ phosphatase (New England Biolabs) for 1 h at 30 °C.

**Measurement of Reactive Oxygen Species.** To quantify reactive oxygen species (ROS), cells were incubated with 5 µM dihydroethidium (DHE) for 10 min and washed three times with PBS, or incubated with dihydrorhodamine 123 (DHR 123) at 15 µM for 90 min and washed three times with PBS, followed by staining with propidium iodide (500 µg/mL) to exclude dead cells. Positive cells were counted by flow cytometry.

**Microscopy.** Yeast cells were imaged on a Zeiss Axiovert 200M microscope using a 100× objective. Images were further processed using ImageJ software (<http://rsbweb.nih.gov/ij/index.html>). For colocalization studies, cells were imaged on a Zeiss LSM 710 microscope using a 63× 1.4 NA objective.

1. Wach A (1996) PCR-synthesis of marker cassettes with long flanking homology regions for gene disruptions in *S. cerevisiae*. *Yeast* 12(3):259–265.
2. Suzuki K, et al. (2001) The pre-autophagosomal structure organized by concerted functions of APG genes is essential for autophagosome formation. *EMBO J* 20(21):5971–5981.
3. Cheong H, Nair U, Geng J, Klionsky DJ (2008) The Atg1 kinase complex is involved in the regulation of protein recruitment to initiate sequestering vesicle formation for nonspecific autophagy in *Saccharomyces cerevisiae*. *Mol Biol Cell* 19(2):668–681.
4. Araki T, Uesono Y, Oguchi T, Toh-E A (2005) LAS24/KOG1, a component of the TOR complex 1 (TORC1), is needed for resistance to local anesthetic tetracaine and normal distribution of actin cytoskeleton in yeast. *Genes Genet Syst* 80(5):325–343.
5. Brengues M, Parker R (2007) Accumulation of polyadenylated mRNA, Pab1p, eIF4E, and eIF4G with P-bodies in *Saccharomyces cerevisiae*. *Mol Biol Cell* 18(7):2592–2602.
6. Buchan JR, Muhlrud D, Parker R (2008) P bodies promote stress granule assembly in *Saccharomyces cerevisiae*. *J Cell Biol* 183(3):441–455.
7. Costello G, Rodgers L, Beach D (1986) Fission yeast enters the stationary phase G0 state from either mitotic G1 or G2. *Curr Genet* 11:119–125.
8. Huang W, Sherman BT, Lempicki RA (2009) Systematic and integrative analysis of large gene lists using DAVID bioinformatics resources. *Nat Protoc* 4(1):44–57.
9. Miller-Fleming L, Cheong H, Antas P, Klionsky DJ (2014) Detection of *Saccharomyces cerevisiae* Atg13 by western blot. *Autophagy* 10(3):10.

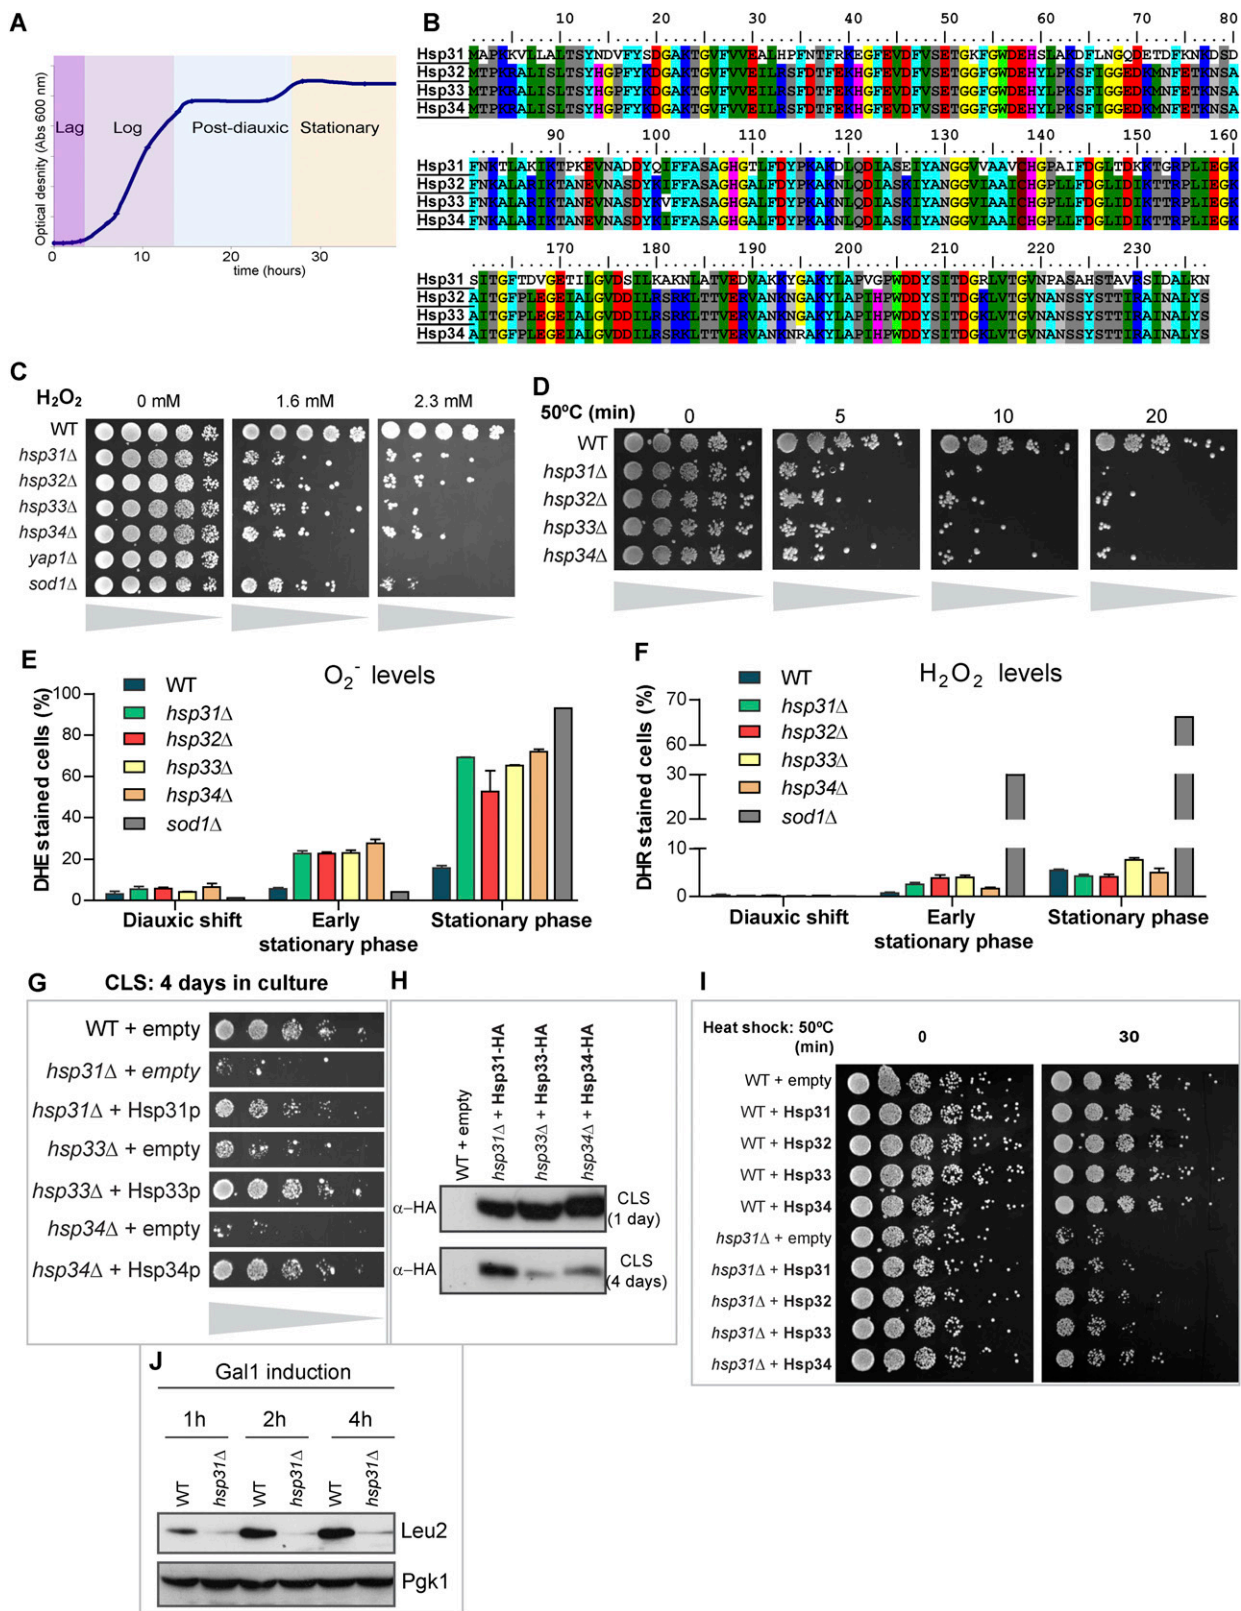

**Fig. S1.** *hsp31Δ*, *hsp32Δ*, *hsp33Δ*, and *hsp34Δ* strains are more sensitive to oxidative and heat stress, have reduced CLS, and accumulate higher levels of ROS. (A) Yeast growth in glucose-rich liquid culture. Yeast cells grown in glucose-rich media exhibit exponential division. Log phase: In this phase, cells obtain energy through fermentation and produce ethanol. When glucose becomes limiting (known as DS) cells enter postdiauxic phase, in which growth rate decreases. Cells readjust their metabolism to aerobic respiration and consequently exhibit higher levels of ROS. In parallel, cells up-regulate stress-response genes, induce autophagy, acquire thicker cell walls, accumulate trehalose, and exhibit decreased protein translation. Upon exhaustion of the available carbon source, cells stop proliferating by arresting their cell cycle in G0 and enter SP. (B) Alignment of the protein sequences of the yeast DJ-1/Thi1/Pfp1 superfamily members: Legend continued on following page





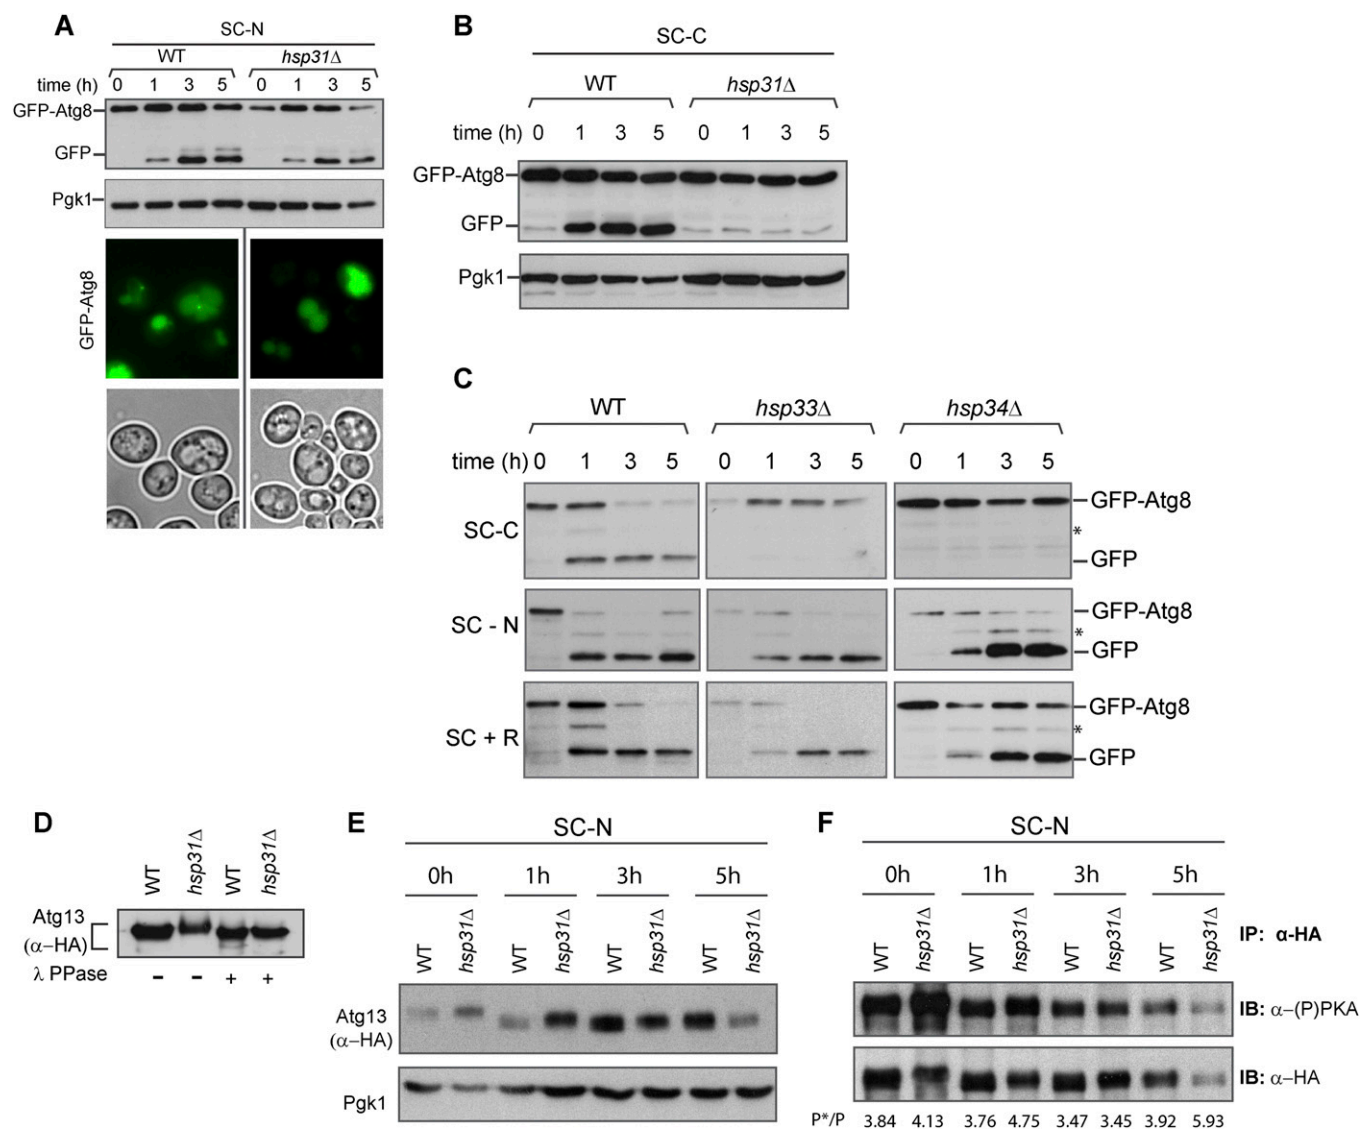

**Fig. 53.** The absence of Hsp31 minifamily members impairs autophagy. (A–C) Autophagy induction in *hsp31Δ*, *hsp33Δ*, and *hsp34Δ* strains requires a carbon source. WT, *hsp31Δ*, *hsp33Δ*, and *hsp34Δ* strains expressing GFP-Atg8 were grown until midlog phase and starved for carbon (SC-C) or nitrogen (SC-N) or treated with rapamycin (SC + R) for the specified time. Total lysates were analyzed by immunoblotting using antibodies against GFP or a housekeeping control Pgk1. (A) After 5-h nitrogen starvation, GFP-Atg8 localization was analyzed by fluorescence and light microscopy. (Magnification: 100 $\times$ .) (B) A longer exposure of the film for the immunoblot shown in Fig. 3A in carbon starvation (SC-C) conditions is shown. (D–F) Analysis of Atg13 phosphorylation. (D) Differences in the electrophoretic mobility of HA-Atg13 from SP are a result of its phosphorylation. HA-Atg13 from SP cell lysates was immunoprecipitated with  $\alpha$ -HA and treated with  $\lambda$ -phosphatase (Ppase) and then run on SDS-polyacrylamide gel to analyze its migration. (E and F) Yeast midlog-phase cultures were starved for nitrogen and harvested at different time points. (E) Migration of HA-Atg13 in SDS-polyacrylamide gels was assessed using an antibody against HA. An antibody for Pgk1 was used as a control for protein loading. (F) Levels of PKA activity are similar in WT and *hsp31Δ* cells upon starvation. Atg13-HA was immunoprecipitated with  $\alpha$ -HA antibody and levels of PKA phosphorylation were assessed. The numbers below the immunoblots indicate the ratio between phosphorylated Atg13 and total Atg13.

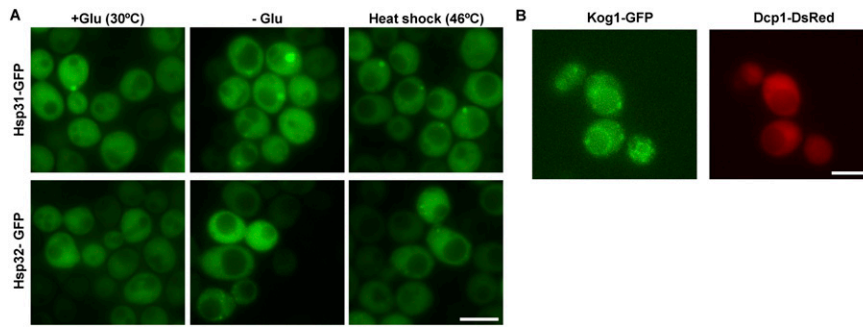

**Fig. 54.** Subcellular localization of Hsp31-GFP, Hsp32-GFP, Kog1-GFP, and DCP1-DsRed. (A) WT cells expressing Hsp31-GFP or Hsp32-GFP in midlog phase (+Glu) were starved for glucose 1 h (-Glu) or incubated at 46 °C for 30 min. (B) Subcellular localization of Kog1-GFP and Dcp1-DsRed in midlog phase. (Scale bar, 5  $\mu$ m.)

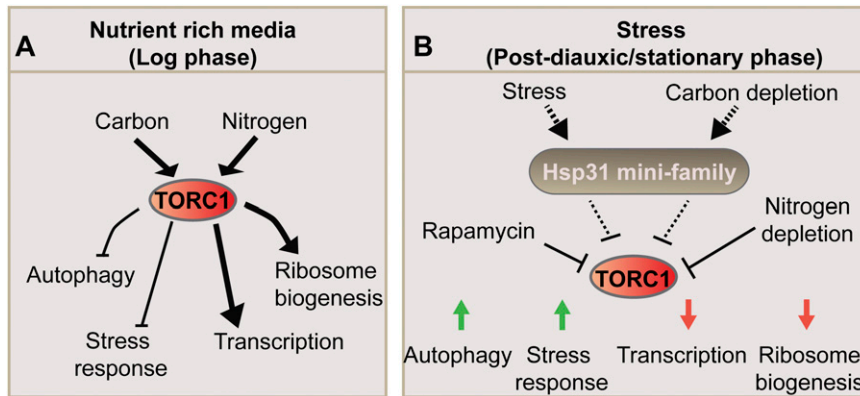

**Fig. 55.** Hsp31 minifamily members modulate target of rapamycin complex 1 (TORC1) activity. (A) Yeast cells grow exponentially (log phase) in the presence of nutrient-rich media containing glucose. TORC1, a conserved kinase, positively regulates processes that contribute to growth, such as ribosome biogenesis and transcription, and represses processes related to stress, including autophagy. (B) Upon stress, treatment with rapamycin, or nutrient deprivation (postdiauxic or SP), the activity of TORC1 decreases and, consequently autophagy and stress genes are induced. In parallel, ribosome biogenesis and transcription are repressed.

**Table S1. Validation of microarrays by qRT-PCR**

| Gene          | <i>hsp31Δ</i> vs. WT |         |         | <i>hsp32Δ</i> vs. WT |         |         | <i>hsp33Δ</i> vs. WT |         |         |
|---------------|----------------------|---------|---------|----------------------|---------|---------|----------------------|---------|---------|
|               | Microarrays          | qRT-PCR | P value | Microarrays          | qRT-PCR | P value | Microarrays          | qRT-PCR | P value |
| <i>SOL4</i>   | 0.14                 | 0.13    | 0.02    | 0.04                 | 0.07    | 0.02    | 0.12                 | 0.09    | 0.02    |
| <i>SSA3</i>   | 0.12                 | 0.11    | 0.00    | 0.14                 | 0.11    | 0.01    | 0.12                 | 0.10    | 0.01    |
| <i>GTT1</i>   | 0.24                 | 0.18    | 0.00    | 0.08                 | 0.08    | 0.01    | 0.15                 | 0.15    | 0.01    |
| <i>TRX3</i>   | 0.42                 | 0.48    | 0.03    | 0.41                 | 0.37    | 0.01    | 0.33                 | 0.35    | 0.01    |
| <i>OM45</i>   | NC                   | 0.24    | 0.01    | 0.26                 | 0.09    | 0.01    | 0.36                 | 0.16    | 0.00    |
| <i>POT1</i>   | 0.15                 | 0.20    | 0.01    | 0.04                 | 0.05    | 0.02    | 0.08                 | 0.07    | 0.01    |
| <i>HXK2</i>   | 5.46                 | 7.31    | 0.00    | 6.08                 | 6.58    | 0.00    | 6.66                 | 20.23   | 0.12    |
| <i>MIG2</i>   | 6.49                 | 4.50    | 0.26    | 8.38                 | 2.84    | 0.00    | 7.94                 | 6.27    | 0.29    |
| <i>HXT4</i>   | 5.74                 | 9.10    | 0.02    | 5.70                 | 5.94    | 0.01    | 4.97                 | 7.80    | 0.01    |
| <i>RPS24A</i> | 2.91                 | 3.02    | 0.00    | 3.42                 | 3.77    | 0.05    | 3.02                 | 1.90    | 0.03    |
| <i>HEM13</i>  | NC                   | 6.73    | 0.01    | 7.25                 | 25.21   | NS      | 4.43                 | 7.42    | NS      |

Eleven differentially expressed genes (DEGs) found in both the gene expression microarrays of *hsp32Δ* and *hsp33Δ* strains were validated by qRT-PCR. Among these 11 genes, 9 were also differentially expressed in *hsp31Δ* cells. The table indicates the fold-change obtained by microarray and qRT-PCR analyses. In addition, it shows the SD and P value obtained by qRT-PCR. (NC, genes that were not changed; NS, statistically not significant).







**Table S4. Components of stress granules and P-bodies identified in association with Hsp31 and Hsp32**

| Proteins                                 | mRNP granule | Source |
|------------------------------------------|--------------|--------|
| Proteins associated with Hsp31           |              |        |
| TIF4631/eIF4G1                           | SG or Pb     | (1)    |
| RPS23B (40S ribosomal subunit)           | SG           | (2, 3) |
| RPL34A (40S ribosomal subunit)           | SG           | (2, 3) |
| RPS26B (40S ribosomal subunit)           | SG           | (2, 3) |
| RPS9B (40S ribosomal subunit)            | SG           | (2, 3) |
| RPG1 (eIF3 subunit)                      | SG           | (4)    |
| TIF11 (eIF1A)                            | SG           | (4)    |
| Proteins associated with Hsp32           |              |        |
| Ygr250c                                  | SG           | (5)    |
| Pbp1                                     | SG           | (5)    |
| Pab1                                     | SG or Pb     | (1)    |
| Tif35 (eIF3 subunit)                     | SG           | (2)    |
| Proteins associated with Hsp31 and Hsp32 |              |        |
| RPS28B (40S ribosomal subunit)           | SG           | (2)    |

Pb, P-body; RNP, RNA-protein; SG, stress granule.

- Bregues M, Parker R (2007) Accumulation of polyadenylated mRNA, Pab1p, eIF4E, and eIF4G with P-bodies in *Saccharomyces cerevisiae*. *Mol Biol Cell* 18(7):2592–2602.
- Grousl T, et al. (2009) Robust heat shock induces eIF2 $\alpha$ -phosphorylation-independent assembly of stress granules containing eIF3 and 40S ribosomal subunits in budding yeast, *Saccharomyces cerevisiae*. *J Cell Sci* 122(Pt 12):2078–2088.
- Buchan JR, Parker R (2009) Eukaryotic stress granules: The ins and outs of translation. *Mol Cell* 36(6):932–941.
- Buchan JR, Yoon J-H, Parker R (2011) Stress-specific composition, assembly and kinetics of stress granules in *Saccharomyces cerevisiae*. *J Cell Sci* 124(Pt 2):228–239.
- Buchan JR, Muhlrud D, Parker R (2008) P bodies promote stress granule assembly in *Saccharomyces cerevisiae*. *J Cell Biol* 183(3):441–455.

**Table S5. Strains used in this study**

| Strain                                  | Genotype                                                                                                                                                                       | Source          |
|-----------------------------------------|--------------------------------------------------------------------------------------------------------------------------------------------------------------------------------|-----------------|
| BY4741                                  | MATa his3 $\Delta$ 0 leu2 $\Delta$ 0 met15 $\Delta$ 0 ura3 $\Delta$ 0                                                                                                          | Open Biosystems |
| BY4742                                  | MAT $\alpha$ his3 $\Delta$ 1 leu2 $\Delta$ 0 lys2 $\Delta$ 0 ura3 $\Delta$ 0                                                                                                   | Open Biosystems |
| <i>hsp32<math>\Delta</math></i> 2n      | MATa/ $\alpha$ his3 $\Delta$ 1 leu2 $\Delta$ 0 ura3 $\Delta$ 0 lys2 $\Delta$ 0/LYS2 met15 $\Delta$ 0/MET15 can1 $\Delta$ ::LEU2-MFA1 pr-HIS3/CAN1+ <i>hsp32</i> ::URA3MX/HSP32 | Open Biosystems |
| <i>hsp31<math>\Delta</math></i>         | MATa his3 $\Delta$ 1 leu2 $\Delta$ 0 met15 $\Delta$ 0 ura3 $\Delta$ 0 <i>hsp31</i> ::kanMX4                                                                                    | (1)             |
| <i>hsp32<math>\Delta</math></i>         | MATa ura3 $\Delta$ 0 leu2 $\Delta$ 0 his3 $\Delta$ 1 lys2 $\Delta$ 0 met15 $\Delta$ 0 can1 $\Delta$ ::LEU2+-MFA1pr-HIS3 <i>hsp32</i> ::URA3MX                                  | Present study   |
| <i>hsp33<math>\Delta</math></i>         | MAT $\alpha$ his3 $\Delta$ 1 leu2 $\Delta$ 0 lys2 $\Delta$ 0 ura3 $\Delta$ 0 <i>hsp33</i> ::NatMX                                                                              | Present study   |
| <i>hsp34<math>\Delta</math></i>         | MAT $\alpha$ his3 $\Delta$ 1 leu2 $\Delta$ 0 lys2 $\Delta$ 0 ura3 $\Delta$ 0 <i>hsp34</i> ::HygMX                                                                              | Present study   |
| Lx Wild-type                            | MATa ura3 $\Delta$ 0 leu2 $\Delta$ 0 lys2 $\Delta$ 0 his3 $\Delta$ 1 can1 $\Delta$ ::LEU2-MFA1pr-HIS3                                                                          | Present study   |
| Lx1 ( <i>hsp31<math>\Delta</math></i> ) | MATa his3 $\Delta$ 1 leu2 $\Delta$ 0 lys2 $\Delta$ 0 ura3 $\Delta$ 0 can1 $\Delta$ ::LEU2-MFA1pr-HIS3 <i>hsp31</i> ::kanMX4                                                    | Present study   |
| Lx2 ( <i>hsp32<math>\Delta</math></i> ) | MATa his3 $\Delta$ 1 leu2 $\Delta$ 0 lys2 $\Delta$ 0 ura3 $\Delta$ 0 can1 $\Delta$ ::LEU2-MFA1pr-HIS3 <i>hsp32</i> ::URA3MX                                                    | Present study   |
| Lx3 ( <i>hsp33<math>\Delta</math></i> ) | MAT $\alpha$ his3 $\Delta$ 1 leu2 $\Delta$ 0 lys2 $\Delta$ 0 met15 $\Delta$ ura3 $\Delta$ 0 can1 $\Delta$ ::LEU2-MFA1pr-HIS3 <i>hsp33</i> ::NatMX                              | Present study   |
| Lx4 ( <i>hsp34<math>\Delta</math></i> ) | MATa his3 $\Delta$ 1 leu2 $\Delta$ 0 lys2 $\Delta$ 0 ura3 $\Delta$ 0 can1 $\Delta$ ::LEU2-MFA1pr-HIS3 <i>hsp34</i> ::HygMX                                                     | Present study   |
| <i>gis1<math>\Delta</math></i>          | MATa his3 $\Delta$ 0 leu2 $\Delta$ 0 met15 $\Delta$ 0 ura3 $\Delta$ 0 <i>gis1</i> ::kanMX4                                                                                     | Open Biosystems |
| <i>sod1<math>\Delta</math></i>          | MATa his3 $\Delta$ 0 leu2 $\Delta$ 0 met15 $\Delta$ 0 ura3 $\Delta$ 0 <i>sod1</i> ::kanMX4                                                                                     | Open Biosystems |
| <i>yap1<math>\Delta</math></i>          | MATa his3 $\Delta$ 0 leu2 $\Delta$ 0 met15 $\Delta$ 0 ura3 $\Delta$ 0 <i>yap1</i> ::kanMX4                                                                                     | Open Biosystems |
| W303                                    | MATa/MAT $\alpha$ {leu2-3,112 trp1-1 can1-100 ura3-1 ade2-1 his3-11,15} [phi+]                                                                                                 | Open Biosystems |

- Skoneczna A, Miciałkiewicz A, Skoneczny M (2007) *Saccharomyces cerevisiae* Hsp31p, a stress response protein conferring protection against reactive oxygen species. *Free Radic Biol Med* 42(9):1409–1420.
